# Supplementary material for: Theoretical screening of a graphyne-supported transition metal single-atom catalyst for the N2 reduction reaction
Source: Royal Society of Chemistry journal article supplement (doi:10.1039/d3cp01363d), 2023-01-01
Supplement: d3cp01363d1.pdf [file d3cp01363d1.pdf]

## Supporting Information

### Theoretical screening of graphyne-supported single transition metals for the N<sub>2</sub> reduction reaction

Min Li,<sup>a</sup> Qinglong Fang,<sup>a, b, c, \*</sup> Xumei Zhao,<sup>a, \*</sup> Caijuan Xia,<sup>a, b, c</sup> Anxiang Wang,<sup>a</sup> You Xie,<sup>d</sup> Fei Ma,<sup>e</sup> Jianmei She,<sup>f</sup> Zhongxun Deng,<sup>f</sup>

<sup>a</sup> School of Science, Xi'an Polytechnic University, Xi'an 710048, Shaanxi, China

<sup>b</sup> Engineering Research Center of Flexible Radiation Protection Technology, University of Shaanxi Province, Xi'an Polytechnic University, Xi'an 710048, Shaanxi, China

<sup>c</sup> Xi'an Key Laboratory of Nuclear Protection Textile Equipment Technology, Xi'an Polytechnic University, Xi'an 710048, Shaanxi, China

<sup>d</sup> College of Science, Xi'an University of Science and Technology, Xi'an, 710054, Shaanxi, China

<sup>e</sup> State Key Laboratory for Mechanical Behavior of Materials, Xi'an Jiaotong University, Xi'an 710049, Shaanxi, China

<sup>f</sup> Shenmu Vocational & Technical College, Shenmu, 719300, Shaanxi, China

\* Corresponding authors.

E-mail addresses: qinglong\_fang@xpu.edu.cn (Qinglong Fang);

20191211@xpu.edu.cn (Xumei Zhao).

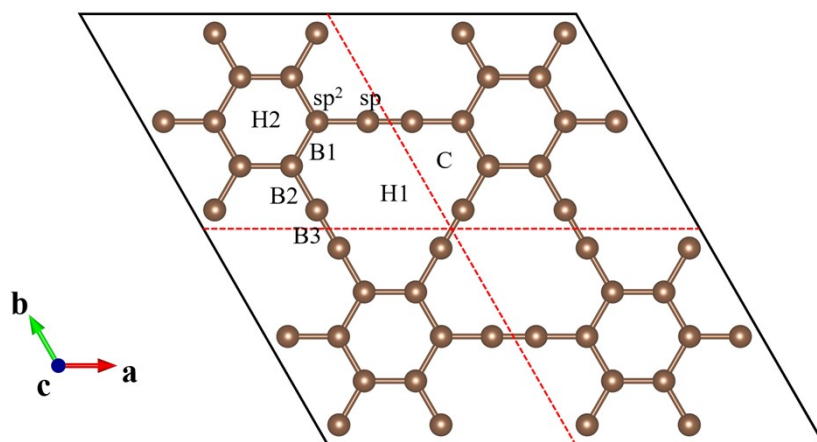

**Fig. S1** The top view of the  $(2 \times 2)$  GY supercell, which  $sp$ - and  $sp^2$ -hybridized C atoms coexist. The all possible adsorption sites of TM are labeled, i.e. B1, B2, B3, H1, H2, and C.

**Table S1.** The N-N bond length ( $L_{N-N}$ , Å) of N<sub>2</sub> adsorbed on TM@GY and the Bader charge ( $Q_{N_2}$ , |e|) transfer between N and TM@GY.

| TM@GY        | End-on        |               | Side-on       |               |
|--------------|---------------|---------------|---------------|---------------|
|              | $L_{N-N}$ (Å) | $Q_{N_2}$ (e) | $L_{N-N}$ (Å) | $Q_{N_2}$ (e) |
| <b>Sc@GY</b> | <b>1.136</b>  | <b>0.236</b>  | <b>1.164</b>  | <b>0.414</b>  |
| Ti@GY        | 1.131         | 0.183         | 1.179         | 0.489         |
| <b>V@GY</b>  | <b>1.131</b>  | <b>0.170</b>  | <b>1.163</b>  | <b>0.361</b>  |
| Cr@GY        | 1.139         | 0.303         | 1.188         | 0.466         |
| <b>Mn@GY</b> | <b>1.138</b>  | <b>0.279</b>  | <b>1.172</b>  | <b>0.371</b>  |
| Fe@GY        | 1.138         | 0.274         | 1.158         | 0.302         |
| Co@GY        | 1.130         | 0.213         | 1.115         | 0.017         |
| Ni@GY        | 1.115         | 0.014         | 1.115         | 0.019         |
| Cu@GY        | 1.115         | 0.005         | 1.115         | 0.006         |
| <b>Y@GY</b>  | <b>1.141</b>  | <b>0.351</b>  | <b>1.165</b>  | <b>0.480</b>  |
| Zr@GY        | 1.130         | 0.185         | 1.180         | 0.563         |
| Nb@GY        | 1.136         | 0.266         | 1.166         | 0.424         |
| Mo@GY        | 1.149         | 0.362         | 1.194         | 0.490         |
| <b>Tc@GY</b> | <b>1.150</b>  | <b>0.377</b>  | <b>1.203</b>  | <b>0.449</b>  |
| Ru@GY        | 1.144         | 0.324         | 1.174         | 0.334         |
| Rh@GY        | 1.134         | 0.225         | 1.115         | 0.014         |
| Pd@GY        | 1.115         | 0.010         | 1.115         | 0.011         |
| Ag@GY        | 1.115         | 0.004         | 1.115         | 0.007         |
| Hf@GY        | 1.135         | 0.189         | 1.189         | 0.559         |

|              |              |              |              |              |
|--------------|--------------|--------------|--------------|--------------|
| Ta@GY        | 1.143        | 0.315        | 1.180        | 0.489        |
| W@GY         | 1.158        | 0.462        | 1.211        | 0.587        |
| Re@GY        | 1.158        | 0.414        | 1.226        | 0.542        |
| <b>Os@GY</b> | <b>1.144</b> | <b>0.297</b> | <b>1.188</b> | <b>0.386</b> |
| Ir@GY        | 1.136        | 0.192        | 1.156        | 0.233        |
| Pt@GY        | 1.115        | 0.010        | 1.115        | 0.011        |
| Au@GY        | 1.115        | 0.005        | 1.115        | 0.005        |

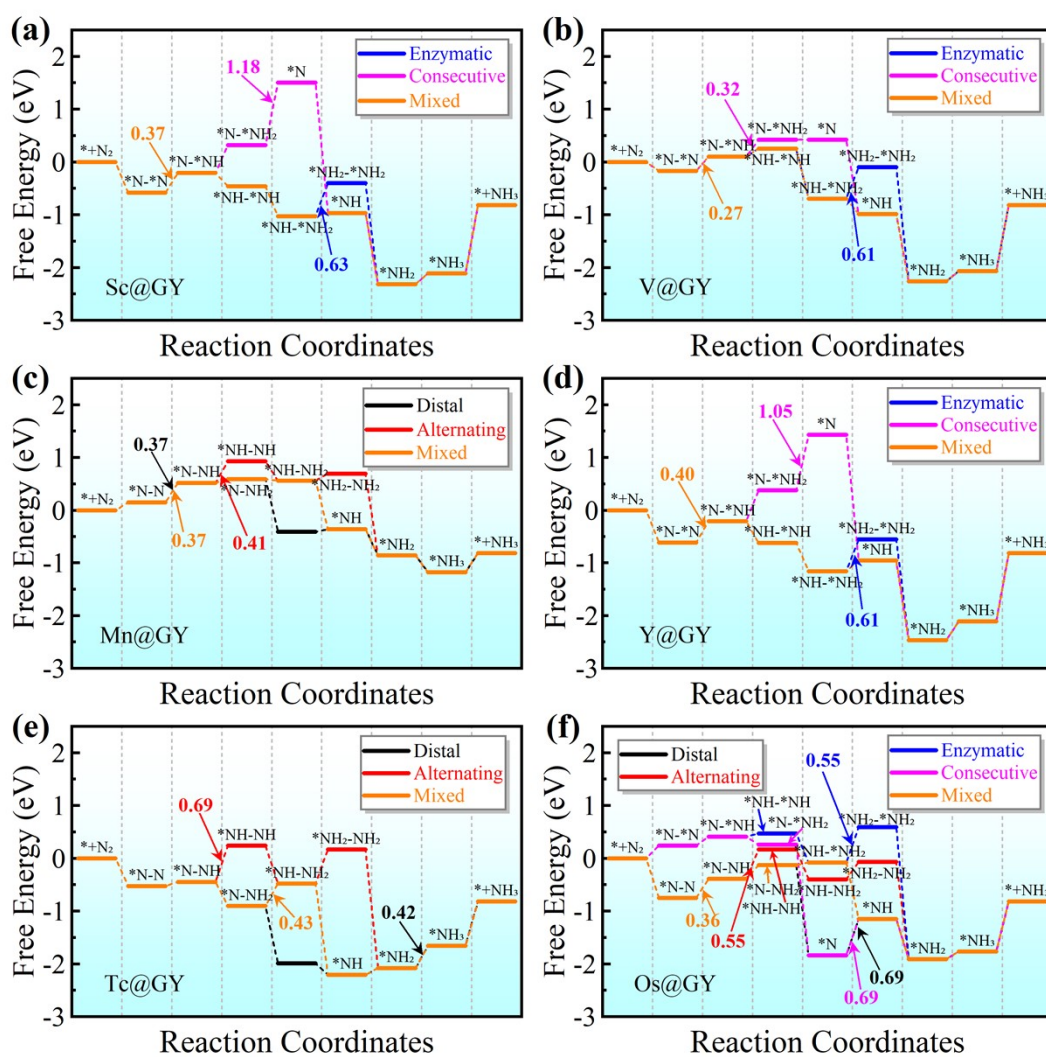

**Fig. S2.** NRR free energy diagrams of NRR on (a) Sc@GY, (b) V@GY, (c) Mn@GY, (d) Y@GY, (e) Tc@GY, and (f) Os@GY via the possible pathways.

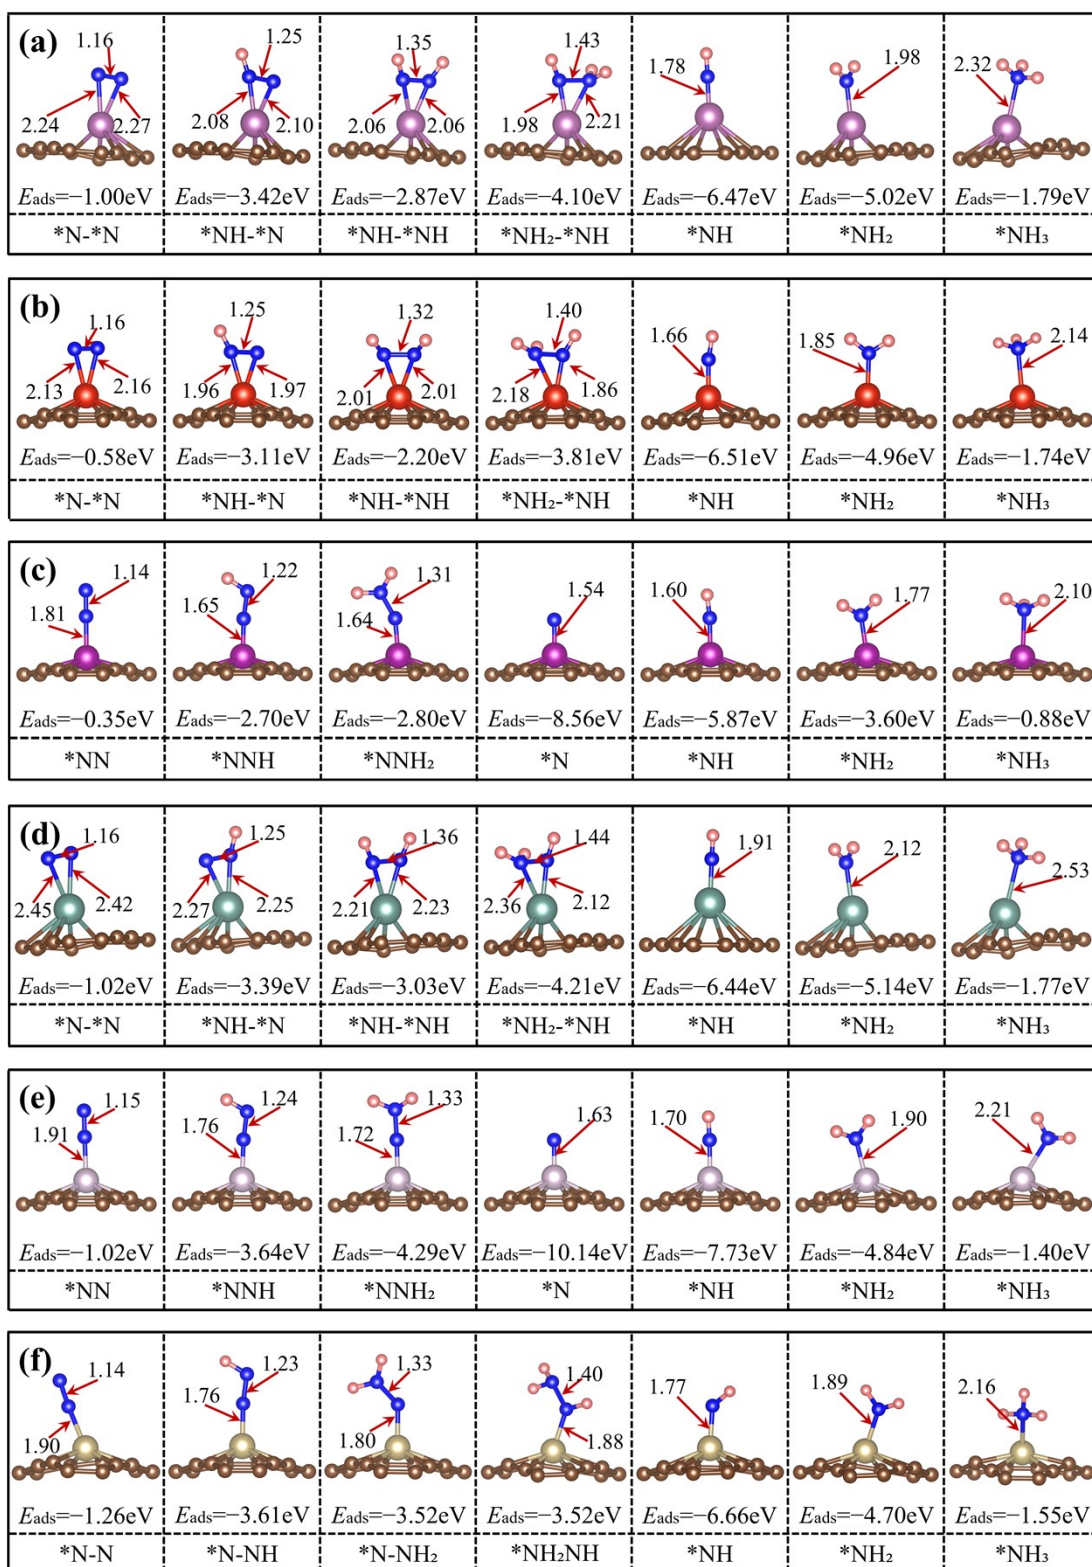

**Fig. S3.** Optimized Structures of the possible intermediates on (a) Sc@GY, (b) V@GY, (c) Mn@GY, (d) Y@GY, (e) Tc@GY, and (f) Os@GY via the most favorable pathway.

The corresponding  $E_{\text{ads}}$  and boYnd length of TM–N and N–N between the Candidate Catalyst and reaction intermediates are also displayed.

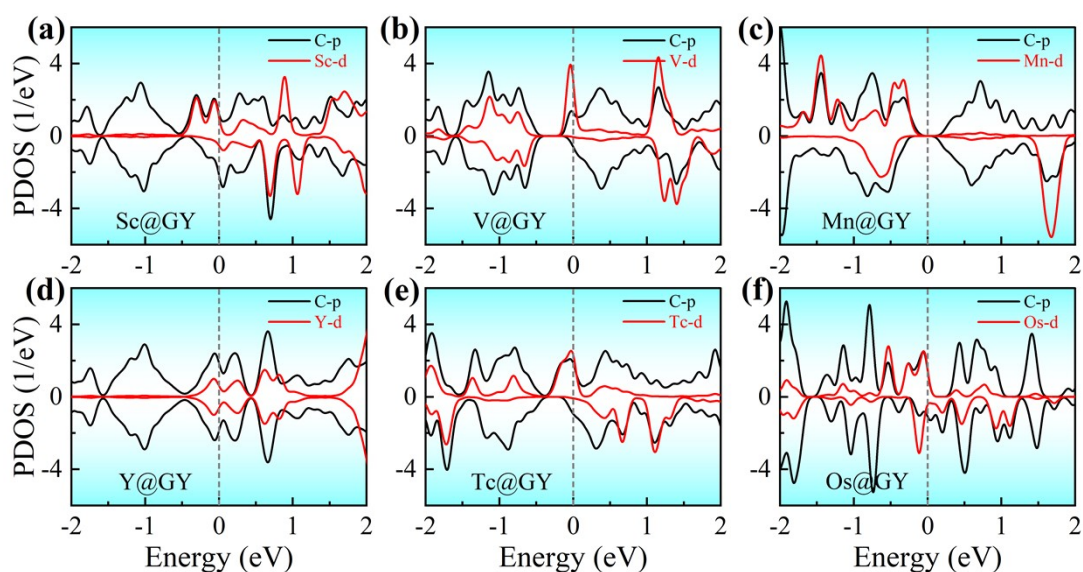

**Fig. S4.** The partial densities of states (PDOS) of (a) Sc@GY, (b) V@GY, (c) Mn@GY, (d) Y@GY, (e) Tc@GY, and (f) Os@GY. The Fermi level is set to zero and indicated by the dotted line.

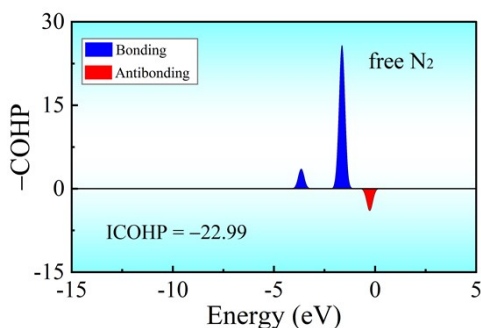

**Fig. S5.** The crystal orbital Hamilton populations (COHPs) of the N–N bond in a free  $\text{N}_2$  molecule.

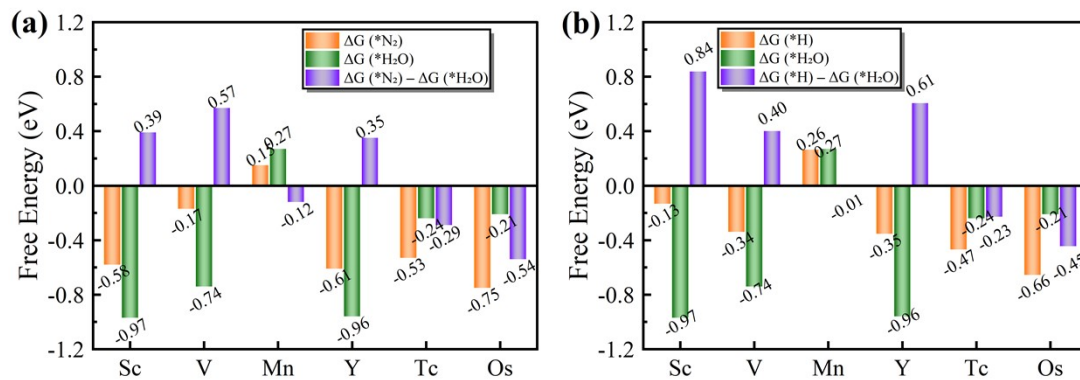

**Fig. S6.** Gibbs free energy of (a)  $^*N_2$  ( $\Delta G_{^*N_2}$ ) and  $^*H_2O$  ( $\Delta G_{^*H_2O}$ ), and the difference between them ( $\Delta G_{^*N_2} - \Delta G_{^*H_2O}$ ) on Sc, V, Mn, Y, Tc, and Os@GY. (b)  $^*N_2$  ( $\Delta G_{^*H}$ ) and  $^*H_2O$  ( $\Delta G_{^*H_2O}$ ), and the difference between them ( $\Delta G_{^*H} - \Delta G_{^*H_2O}$ ) on Sc, V, Mn, Y, Tc, and Os@GY.
